# Supplementary material for: Simple Trans-Platinum Complex Bearing 3-Aminoflavone Ligand Could Be a Useful Drug: Structure-Activity Relationship of Platinum Complex in Comparison with Cisplatin
Source: PubMed Central journal article supplement (PMC7139614; doi:10.3390/ijms21062116), 2020-03-19
Supplement: ijms-21-02116-s001.pdf [file ijms-21-02116-s001.pdf]

## Supporting information

**Table S1.** Mean values of geometric parameters around the Pt center in the selected platinum complexes: bond lengths (in Å) and angles (in degrees).

| refcode  | Pt-Cl | Pt-N  | Cl-Pt-N | Cl-Pt-Cl | N-Pt-N |
|----------|-------|-------|---------|----------|--------|
| MONVIW   | 2.298 | 2.064 | 87.3    | 180      | 180    |
| RIWCEG   | 2.305 | 2.005 | 89.1    | 178.2    | 176.5  |
| VOHBAW   | 2.303 | 2.024 | 83.8    | 180      | 180    |
| BERDAE   | 2.306 | 2.031 | 92.6    | 92.1     | 82.7   |
| BERDEI   | 2.318 | 2.021 | 91.0    | 93.5     | 84.4   |
| CCENPT01 | 2.319 | 2.033 | 91.7    | 93.2     | 83.1   |
| DIVXOV   | 2.307 | 2.025 | 91.7    | 92.8     | 83.8   |
| FITFUJ   | 2.308 | 2.025 | 92.1    | 92.7     | 83.0   |
| LAYZEQ   | 2.312 | 2.032 | 86.8    | 92.6     | 90.2   |
| LEFFAD   | 2.301 | 2.039 | 91.3    | 92.0     | 83.2   |
| LIXTOB   | 2.315 | 2.043 | 88.1    | 93.8     | 90.0   |
| PEXTIV   | 2.325 | 2.031 | 90.8    | 94.8     | 83.6   |
| PIFGIU   | 2.307 | 2.051 | 87.3    | 93.0     | 92.8   |
| SUDMIN02 | 2.323 | 2.085 | 88.2    | 92.5     | 90.0   |
| TAJTED   | 2.316 | 2.034 | 91.9    | 93.7     | 82.6   |
| TUPQIE   | 2.312 | 2.051 | 92.9    | 90.8     | 83.8   |
| UCIZUC   | 2.329 | 2.040 | 86.9    | 93.0     | 93.0   |
| YIDVUD   | 2.299 | 2.049 | 88.9    | 91.3     | 91.3   |

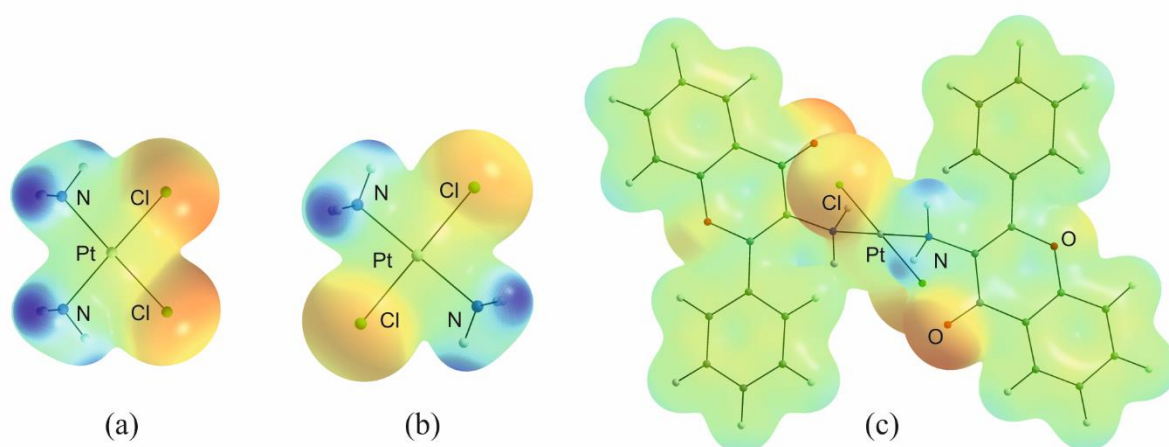

**Figure S1.** Molecular electrostatic potential maps with the colored scale corresponding to values ranging from  $-0.10$  (red) to  $+0.20$  au (blue) mapped onto the  $0.01$  au isosurface of electron density: cisplatin (a), transplatin (b) and *trans*-Pt(3-af)<sub>2</sub>Cl<sub>2</sub> (c) calculated at the B3LYP/def2-TZVPP level.
